1 **MinION™, a portable long-read sequencer, enables rapid vaginal microbiota**  
2 **analysis in a clinical setting**

3 **Running title: MinION™ enables rapid vaginal microbiota analysis**

4

5 Shinnosuke Komiya<sup>1,2</sup>, Yoshiyuki Matsuo<sup>3,\*</sup>, So Nakagawa<sup>4</sup>, Yoshiharu Morimoto<sup>2</sup>,  
6 Kirill Kryukov<sup>5</sup>, Tadashi Imanishi<sup>4</sup>, Hidetaka Okada<sup>1</sup>, and Kiichi Hirota<sup>3</sup>

7 <sup>1</sup>Department of Obstetrics and Gynecology, Kansai Medical University Graduate  
8 School of Medicine, Osaka, Japan

9 <sup>2</sup>HORAC Grand Front Osaka Clinic, Osaka, Japan

10 <sup>3</sup>Department of Human Stress Response Science, Institute of Biomedical Science,  
11 Kansai Medical University, Osaka, Japan

12 <sup>4</sup>Department of Molecular Life Science, Tokai University School of Medicine,  
13 Kanagawa, Japan

14 <sup>5</sup>Department of Genomics and Evolutionary Biology, National Institute of Genetics,  
15 Shizuoka, Japan

16

17 \*Correspondence:

18 Yoshiyuki Matsuo

19 [ysmatsuo-kyt@umin.ac.jp](mailto:ysmatsuo-kyt@umin.ac.jp)

20 Department of Human Stress Response Science, Institute of Biomedical Science,  
21 Kansai Medical University, 2-5-1 Shin-machi, Hirakata, Osaka 573-1010, Japan

22

23 **Abstract**

24 It has been suggested that the local microbiota in the reproductive organs is relevant to  
25 women's health and may also affect pregnancy outcomes. Analysis of partial 16S  
26 ribosomal RNA (rRNA) gene sequences generated by short-read sequencers has been  
27 used to identify vaginal and endometrial microbiota, but it requires a long time to obtain  
28 the results, making it unsuitable for the rapid analysis of small samples in a clinical  
29 context. We demonstrated a simple workflow using the nanopore sequencer MinION™  
30 that allows high-resolution and rapid differentiation of vaginal microbiota. Vaginal  
31 samples collected from 18 participants were subjected to DNA extraction and full-  
32 length 16S rRNA gene sequencing with MinION™. The principal coordinate analysis  
33 showed no differences in the bacterial compositions regardless of the sample collection  
34 method. The vaginal microbiota results could be reported within 2 days of specimen  
35 receipt. Although bacterial vaginosis (BV) was not diagnosed by the Nugent score in  
36 any cases, groups with both healthy and BV-like vaginal microbiota were clearly  
37 characterized by MinION™ sequencing. We conclude that full-length 16S rRNA gene  
38 sequencing analysis with MinION™ provides a rapid means for identifying vaginal  
39 bacteria with higher resolution. Species-level profiling of human vaginal microbiota by  
40 MinION™ sequencing can allow the analysis of associations with conditions such as  
41 genital infections, endometritis, and threatened miscarriage.

42

43 **Keywords**

44 16S rRNA, bacterial vaginosis, next-generation sequencer, long-read sequencer,  
45 MinION™

46

47 **Introduction**

48 Bacterial vaginosis (BV) is one of the most common gynecological disorders among  
49 women of reproductive age. It is caused by disruption of the vaginal microbiota, and has  
50 relatively mild subjective symptoms, such as abnormal vaginal discharge (Thomason, et  
51 al., 1991). BV has been clinically reported to cause adverse reproductive outcomes,  
52 including sexually transmitted infections, genitourinary viral infections such as HIV-  
53 1/2, HPV, and HSV-2 (Nardis, et al., 2013), and preterm delivery (Larsson, et al., 2005).  
54 Currently, Amsel's criteria based on clinical outcomes (Amsel, et al., 1983) and the  
55 Nugent score using Gram stain findings (Nugent, et al., 1991) are used as diagnostic  
56 criteria for BV. These methods are easy to use, but since they are based on the  
57 subjective opinion of the physician, the diagnosis largely depends on the skill of the  
58 examiner (van den Munckhof, et al., 2019). Bacterial culture of vaginal discharge is also  
59 a standard method to investigate the vaginal microbiota, but some bacteria are difficult  
60 to culture (van den Munckhof, et al., 2019). Moreover, in routine gynecological  
61 practice, vaginal discharge is not sampled unless patients have symptoms suggestive of  
62 vaginosis. Therefore, accurately assessing the vaginal microbiota has been difficult with  
63 these regular clinical methods.

64 16S ribosomal RNA (rRNA) gene sequencing analysis using next-generation  
65 sequencers can be used to identify bacteria without culture in a manner not dependent  
66 on subjective assessment by the examiner. Previous studies have shown that the vaginal  
67 microbiota of healthy women is classified into community state type (CST) I to V  
68 (Ravel, et al., 2011). CST is defined by the dominant bacteria as follows: CST I:  
69 *Lactobacillus crispatus*, CST II: *Lactobacillus gasseri*, CST III: *Lactobacillus iners*,  
70 CST IV: lack of *Lactobacillus* spp., and CST V: *Lactobacillus jensenii*. These narrow  
71 definitions mean that undiagnosed cases of vaginal dysbiosis may be present. This new  
72 classification of the vaginal microbiota has been clarified by performing sequencing  
73 analysis on cases with no clinical symptoms. Because a deeper and more accurate

74 understanding of the vaginal microbiota may provide new clinical insights, we should  
75 demonstrate that 16S rRNA analysis is quick and easy to perform in a broad range of  
76 contexts in clinical practice.

77 MinION™ (Oxford Nanopore Technologies Ltd., Oxford, UK) detects the signal of a  
78 DNA nucleotide that passes through a nanopore arranged on a flow cell (Mikheyev and  
79 Tin, 2014). This long-read sequencing technology can be used to identify bacterial  
80 microbiota with the whole region of the 16S rRNA. MinION™ is smaller, lighter, and  
81 easier to deploy than conventional short-read sequencers, and it also offers the  
82 advantage of high-resolution microbiota analysis with long-read sequencing  
83 (Mitsuhashi, et al., 2017) (Kai, et al., 2019) (Nakagawa, et al., 2019). We constructed an  
84 in-hospital vaginal microbiota-analyzing workflow using MinION™. This is the first  
85 report to demonstrate that MinION™ can provide rapid patient feedback regarding  
86 vaginal microbiota analysis.

87 **Materials and Methods**

88 **Ethics statement**

89 This study is a cross-sectional observational trial approved by the institutional review  
90 board of the medical corporation Sankeikai (Approval Number: 2019-38). After the  
91 approval, the study protocol was submitted to the UMIN-CTR clinical trial registry site  
92 (<https://www.umin.ac.jp/ctr/index.htm>) (trial registration number: UMIN000038032),  
93 which met the criteria of the International Committee of Medical Journal Editors  
94 (ICMJE).

95

96 **Recruitment of participants**

97 From April 2019 to May 2020, participants who met all of the following enrollment  
98 criteria were recruited: 1) primary infertility patients attending HORAC Grand Front  
99 Osaka Clinic in Osaka, Japan; 2) premenopausal Japanese women who were not  
100 pregnant; 3) no clinical symptoms strongly suggestive of BV; 4) scheduled hormone  
101 replacement embryo transfer cycle with frozen-thawed blastocyst; and 5) those who  
102 provided written consent. The exclusion criteria were as follows: 1) known history of  
103 HIV-1/2, hepatitis B/C, syphilis, or genital chlamydia infection; 2) known history of  
104 diabetes; 3) known history of cervical/vaginal surgery; 4) known history of intrauterine  
105 device use; and 5) known history of antibiotic, steroid, or vaginal suppository use within  
106 2 weeks. In addition to collecting vaginal samples, details of age, body mass index, and  
107 basal hormone levels (anti-Mullerian hormone, luteinizing hormone, and follicle-  
108 stimulating hormone on days 2–4 of the menstrual cycle), medical history, and  
109 infertility treatment history were collected from the medical records. All vaginal  
110 samples were collected on the day of embryo transfer.

111

112 **Nugent score**

113 Vaginal smears were analyzed by pathologists affiliated with an external laboratory, and

114 the Nugent score was calculated based on microscopic findings: the numbers of  
115 *Lactobacillus* (scored as 0 to 4), *Gardnerella* (scored as 0 to 4), and *Mobiluncus* (scored  
116 as 0 to 2). A total score of 0 to 3 was diagnosed as representative of healthy vaginal  
117 microbiota, 4 to 6 as an intermediate group, and 7 or more as BV (Nugent, et al., 1991).  
118 Inappropriate samples with defective specimen collection were diagnosed as  
119 indeterminate. If BV was diagnosed based on the Nugent score, our policy was to treat  
120 it using antibiotics.

121

### 122 **Vaginal sample collection method**

123 Vaginal lavage samples were collected from 18 participants; from four participants,  
124 additional swab samples were collected with written consent. When both lavage and  
125 swab samples were collected, the swab samples were collected first. For the lavage  
126 method, the inside of the vagina was washed with 10 ml of sterile saline, and at least 2  
127 ml was collected using a sterile syringe. Collected lavage samples were stored at  $-30^{\circ}\text{C}$   
128 until DNA extraction. For the swab method, vaginal mucus from the uterovaginal  
129 region was collected using a packaged OMNIgene vaginal kit (OMR-130; DNA  
130 Genotek Inc., Ottawa, Canada). Swab samples were stored at room temperature until  
131 DNA extraction, in accordance with the manufacturer's instructions.

132

### 133 **Sequencing sample preparation**

134 DNA was extracted from 22 human vaginal samples using the QIAamp UCP Pathogen  
135 Mini Kit (QIAGEN, Venlo, Netherlands) by the bead beating and spin protocol, in  
136 accordance with the manufacturer's instructions. After extraction, the DNA content was  
137 measured using a NanoDrop<sup>®</sup> 1000 Spectrophotometer (Thermo Fisher Scientific, MA,  
138 USA), and the concentrations of extracted DNA from the swab and lavage samples were  
139 6.1–32.3 ng/ $\mu\text{l}$  and 53.1–1092.4 ng/ $\mu\text{l}$ , respectively.

140

141 **MinION™ sequencing**

142 As described in our previous report (Matsuo, et al., 2020), a slightly modified version of  
143 four-primer polymerase chain reaction (PCR) with rapid adapter attachment was  
144 performed. For amplification of the V1-9 region of the 16S rRNA gene, a forward  
145 primer (S-D-Bact-0008-c-S-20) with the anchor sequence 5'-  
146 TTTCTGTTGGTGCTGATATTGCAGRGTTYGATYMTGGCTCAG-3' and a reverse  
147 primer with the anchor sequence 5'-  
148 ACTGCCTGTCGCTCTATCTTCGGYTACCTTGTTACGACTT-3' were used as  
149 inner primers. For amplification of the V3-4 region, 341F with the anchor sequence 5'-  
150 TTTCTGTTGGTGCTGATATTGCCCTACGGGNGGCWGCAG-3' and 806R with the  
151 anchor sequence 5'-  
152 ACTGCCTGTCGCTCTATCTTCGGACTACHVGGGTWTCTAAT-3' were used as  
153 inner primers. PCR amplification of the 16S rRNA gene was performed using the  
154 KAPA2G™ Robust HotStart ReadyMix PCR Kit (Kapa Biosystems, MA, USA) with  
155 an inner primer pair (50 nM for each) and the outer primer mixture (10 nM) of PCR  
156 Barcoding Kit (SQK-PBK004; Oxford Nanopore Technologies, Oxford, UK) in a total  
157 volume of 25 µl. Each sample was assigned an individual barcode, which was used to  
158 identify the PCR product. Amplification was performed under the following PCR  
159 conditions: initial denaturation at 95 °C for 3 min; five cycles of 15 s at 95 °C, 15 s at  
160 55 °C, and 30 s at 72 °C; and 30 cycles of 15 s at 95 °C, 15 s at 62 °C, and 30 s at  
161 72 °C; followed by a final extension at 72 °C for 1 min. The amplification products  
162 were confirmed using 1% agarose gel electrophoresis (1 × TAE buffer) to be  
163 approximately 1600 base pairs (V1-9 region) and 400 base pairs (V3-4 region), which  
164 are the expected amplification sizes. After confirmation, the amplified DNA was  
165 purified using AMPure® XP (Beckman Coulter, CA, USA). A total of 100 ng (10 µl) of  
166 purified DNA was incubated with 1 µl of Rapid Adapter (Oxford Nanopore  
167 Technologies Ltd.) at room temperature for 5 min. The concentrations of swab samples

168 and lavage samples were 8.3–34 ng/μl and 3.58–61 ng/μl, respectively, as determined  
169 using a Quantus™ Fluorometer (Promega, WI, USA). Based on the manufacturer's  
170 instructions, the prepared DNA library (total of 11 μl) was mixed with 34 μl of  
171 Sequencing Buffer, 25.5 μl of Loading Beads, and 4.5 μl of water. The final adjusted  
172 sample was loaded into the flow cell R.9.4.1 (FLO-MIN106; Oxford Nanopore  
173 Technologies Ltd.) and attached to the MinION™ Mk1B, which was connected to a  
174 personal computer. In this study, four to six samples were loaded at one time and each  
175 sequencing session lasted about 90 min. DNA sequencing data were acquired using  
176 MINKNOW software ver. 1.11.5 (Oxford Nanopore Technologies Ltd.), in accordance  
177 with the manufacturer's instructions.

178

### 179 **Bioinformatic Analysis Workflow**

180 We performed the bioinformatic analysis using a pipeline of multiple programs built in  
181 accordance with our previous reports (Mitsuhashi, et al., 2017) (Nakagawa, et al., 2019).  
182 An overview is given below.

183 1) Computer: Apple iMac 27-inch, Late 2015 (OS, macOS 10.14.6; CPU, 3.3 GHz Intel  
184 Core i5-6600; memory, 16 GB)

185 2) GUPPY software ver. 3.1.5 (Oxford Nanopore Technologies Ltd.): base calling,  
186 conversion of FAST5 files to FASTQ files with quality control based on quality score >  
187 7.

188 3) SeqKit software ver. 0.10.0 (Shen, et al., 2016): extraction of a read length of 1,300  
189 to 1,950 bp, based on the 16S rRNA length registered in the SILVA rRNA database ver.  
190 132 (<https://www.arb-silva.de/>).

191 4) TANTAN program ver. 18 (Frith, 2011): removing simple repeat sequences.

192 5) Minimap2 program ver. 2.14 (Li, 2018): eliminating human genome information  
193 (Human Genome Assembly GRCh38) and matching each genome read to the 5,850  
194 representative bacterial genome sequences (Table S1) stored in the GenomeSync



195 database (<http://genomesync.org>).

196 6) In-house Perl scripts: selecting the species with the highest Minimap2 score and

197 determining the taxa based on the NCBI taxonomy database.

198 7) Krona software version 2.7 (Ondov, et al., 2011): visualizing the frequency of

199 detected bacterial species in a given sample.

200

### 201 **Statistical analysis**

202 Principal coordinate analysis was performed and the results were visualized with R

203 version 4.0.2.

204

205

## 206 **Results**

### 207 **Characteristics of participants**

208 Our study consisted of 18 Japanese, ranging from 30 to 43 years of age, with a median  
209 age of 36.5. All participants had primary infertility with normal menstrual cycles, along  
210 with no underlying medical conditions (Table I).

211

### 212 **Identification of vaginal bacteria**

213 The composition of the vaginal microbiota was investigated by 16S rRNA gene  
214 amplicon sequencing on the MinION™ platform (Fig. 1). The V1–9 MinION™  
215 sequencing for almost 90 min yielded 15,836–119,745 reads at first and then filtered  
216 10,688–103,212 reads satisfying the conditions of 1,300–1,950 bp and QC > 7 (details  
217 in Table II). The results of microbiota analysis of the filtered 3,000 reads using  
218 MinION™ are shown in Supplementary Table S2.

219

### 220 **Comparison of the results of swab and lavage samples**

221 For subjects 1–4, lavage and swab samples were collected and bacterial DNA extraction  
222 and 16S rRNA analysis were performed to determine the effect of the sample collection  
223 method on the results of the microbiota analysis. After filtering, 3,000 reads were  
224 randomly extracted in eight samples (1-4\_lavage and 1-4\_swab), the results of which  
225 are shown in Fig. 2, with almost the same identification with the two sampling methods.  
226 We performed principal coordinate analysis (PCoA) to assess the equivalence of the  
227 lavage and swab sampling methods, the results of which are shown in Fig. 3. Regardless  
228 of the sample collection method, the results of the analysis of the same subjects  
229 involved almost the same coordinates.

230

### 231 **Comparison of the results of sequence read number**

232 To assess the effect of read count on the results of the MinION™ sequencing, three

233 samples that showed characteristic bacterial microbiota [5\_lavage: *Lactobacillus iners*  
234 dominant (>99%), 6\_lavage: *Lactobacillus crispatus* dominant (>99%), 8\_lavage: BV  
235 like] were selected and their taxonomic profiles were compared after filtering for 3,000  
236 reads (random sampling) and 10,000 reads (random sampling) (Fig. 4). In all  
237 specimens, the results of vaginal microbiota analysis in MinION™ were similar for  
238 different numbers of reads.

239

#### 240 **Comparison of the results of V1–9 and V3–4 16S rRNA gene sequencing**

241 For the taxonomic classification of bacteria, we compared the resolution of long-read  
242 (V1–9) and short-read (V3–4) 16S amplicon sequencing for six samples (sample  
243 numbers 5, 6, 9, 10, 11, and 14). Of these, for sample numbers 5, 9, and 10,  
244 *Lactobacillus iners* was confirmed to be present at a rate of more than 99% (Group I),  
245 while for sample numbers 6, 11, and 14, *Lactobacillus crispatus* was confirmed to be  
246 present at more than 99% (Group C) in the V1–9 16S rRNA analysis.  
247 The V3–4 region was amplified by four-primer PCR from the bacterial DNA of six  
248 samples and sequenced with MinION™. From each sequencing result, 3,000 reads were  
249 randomly extracted and the results of the analysis of the V1–9 region were compared  
250 with those of the V3–4 region (Fig. 5). In Group I, *Lactobacillus iners* was classified as  
251 being present at a rate of more than 98% in the V3–4 S16 rRNA analysis, which was  
252 comparable to the results obtained by the V1-9 sequencing (Fig. 5a). In Group C, the  
253 V3-4 sequence alignment resulted in ambiguous identification of *Lactobacillus* species  
254 (Fig. 5b). All samples showed *Lactobacillus crispatus*, *Lactobacillus acidophilus*,  
255 *Lactobacillus helveticus*, *Lactobacillus amylovorus*, *Lactobacillus kefiranofaciens*,  
256 *Lactobacillus hamsteri*, *Lactobacillus gallinarum*, and *Lactobacillus kalixensis* in the  
257 V3–4 S16 rRNA analysis as potentially existing species, which were found in similar  
258 proportions across all samples in Group C.

259 **Discussion**

260 The vaginal microbiota is characterized by particularly low diversity compared with that  
261 in other parts of the body (Human Microbiome Project, 2012). Conventional methods,  
262 such as Amsel's criteria, the Nugent score, and bacterial culture, have enabled only  
263 rough assessment of the vaginal microbiota. Next-generation sequencing (NGS) has  
264 revolutionized the profiling of the bacterial microbiota. In short, the combination of  
265 metagenomic sequencing and bioinformatic technology has made it possible to more  
266 accurately assess the bacterial microbiota without the influence of uncertainties such as  
267 examiner subjectivity or the capturability of each bacterium (van den Munckhof, et al.,  
268 2019). The MinION™ platform allows a single flow cell to be used repeatedly by  
269 assigning individual barcodes. MinION™ allows data generation by immediately  
270 reading the amplicon sequences that pass through the nanopores placed on the substrate  
271 of the flow cell. The real-time data generation allows the sequencing to end when the  
272 data reach the target amount. In particular, analysis of the vaginal microbiota is a field  
273 in which MinION™'s capabilities can be maximized because of the low complexity of  
274 this microbiota under healthy conditions. However, to date, no studies have examined  
275 clinical vaginal metagenomic samples with MinION™ technology. In vaginal  
276 microbiota analysis, it is important to be able to profile *Lactobacillus* spp. and the  
277 causative organisms of BV at the species level. Interestingly, no cases were diagnosed  
278 with BV by the Nugent score in this study, but the results of vaginal microbiota analysis  
279 using MinION™ to determine the profile by Minimap2 best-hit score identified not only  
280 healthy vaginal microbiota but also cases with BV-like microbiota (Supplementary  
281 Table S2).

282 In this study, 90-min MinION™ sequencing yielded 15,836 to 119,745 reads (Table II).  
283 To estimate the shortest sequencing time for accurately assessing constituents of the  
284 vaginal microbiota, the results of the analyses of 3,000, 10,000, and all reads were  
285 compared in the typical cases of healthy vaginal microbiota and BV. The results were

286 not affected by increasing the number of reads to 3,000 or more (Fig. 4), so we  
287 concluded that 3,000 reads were sufficient for vaginal microbiota analysis. A  
288 calculation using the median filtered reads predicted that 3,000 reads would be  
289 accumulated in a sequence of approximately 8 min, indicating that the time required for  
290 vaginal microbiota analysis using MinION™ could be further reduced.

291 Previous studies on short-read sequencing have reported that the sample collection  
292 method had no effect on the results (Virtanen, et al., 2017). Therefore, we collected  
293 swab and lavage samples from the same cases to determine whether the effect of the  
294 sample collection method was negligible in the case of long-read sequencing with our  
295 bioinformatic pipeline in 3,000 randomly sampled reads (Fig. 2). When a single  
296 bacterial taxon comprised 98%–99% of the total bacteria (sample numbers 1 and 4),  
297 there was no change in the composition ratio depending on the sample collection  
298 method. When the vaginal microbiota was composed of more than two bacteria (sample  
299 numbers 2 and 3), the bacterial species comprising the microbiota were found to be the  
300 same, although there were slight differences in the proportions present. PCoA was  
301 performed to visualize the influence of the sample collection method (Fig. 3).

302 Regardless of the sampling method, each sample was located in approximately the same  
303 coordinates and we thus concluded that the sample collection method had no effect in  
304 MinION™ sequencing. As this is the first report of vaginal microbiota analysis using  
305 MinION™, we mainly selected lavage samples to ensure the recovery of more  
306 organisms, but we were able to show that swab samples were sufficient.

307 To clarify the usefulness of long-read sequencing, one of the properties of MinION™,  
308 we picked up *Lactobacillus iners*-dominant (> 99% in V1–9 analysis) samples (Group I:  
309 sample numbers 5, 9, and 10) and *Lactobacillus crispatus*-dominant (>99% in V1–9  
310 analysis) samples (Group C: sample numbers 6, 11, and 14) and compared the results of  
311 16S rRNA analyses of the V1–9 and V3–4 regions (Fig. 5). The bioinformatic pipeline  
312 used a method where each amplicon sequence was directly compared with the database,

313 scored for similarity (Minimap2 score) according to a proprietary algorithm, and then  
314 applied to the bacterial species with the highest score. Hence, if there were multiple  
315 species with the same score, we treated the reads as potentially existing in all of the  
316 possible species. The reads assigned to “Others” in this study could be (1) bacteria with  
317 low abundance, or (2) bacteria that could not be assigned to a single species due to  
318 competition between multiple species. In Group I (Fig. 5a), *Lactobacillus iners* was  
319 well recognized in the V3–4 16S rRNA analysis, but the numbers of reads assigned to  
320 “Others” increased in the V3–4 analysis with 41.9, 44.8, and 57.4 reads compared with  
321 6.0, 5.0, and 6.0 reads in the V1–9 analysis, respectively. In Group C (Fig. 5b), V3–4  
322 analysis showed that *Lactobacillus crispatus* accounted for about 50% of the reads and  
323 *Lactobacillus acidophilus*, *Lactobacillus helveticus*, *Lactobacillus amylovorus*,  
324 *Lactobacillus kefiranofaciens*, *Lactobacillus hamsteri*, and *Lactobacillus gallinarum*  
325 were classified in similar proportions in all three specimens, which had not been found  
326 in V1–9 analysis. The numbers of reads assigned to “Others” were 15.5, 25.5, and 36.0  
327 reads in groups V1–9 and 130.2, 110.5, and 176.6 reads in groups V3–4, respectively.  
328 This suggested that assigning bacteria using the V1–9 region is more informative for  
329 determining the appropriate bacterial species than using only the V3–4 region. Similar  
330 to our previous report (Matsuo, et al., 2020), the long-read sequencing with MinION™  
331 showed high identification accuracy compared with the short-read sequencing under the  
332 same bioinformatic pipeline.

333 In terms of the usefulness of the MinION™ sequencer in gynecological practice, it is  
334 interesting that we were able to show the detailed condition of vaginal dysbiosis in a  
335 short period of time, which was not noted by the Nugent score. It has been suggested  
336 that vaginal dysbiosis may have a connection with the incidence of sexually transmitted  
337 infections (Shipitsyna, et al., 2020) and genital viral infections (Borgogna, et al., 2020)  
338 (Hoang, et al., 2020) or cervical lesions (Dahoud, et al., 2019). It has also been shown  
339 that metagenomic analysis using NGS applications to assess vaginal microbiota can

340 provide more accurate results than conventional methods such as the Nugent score,  
341 Amsel's criteria, and bacterial cultures (van den Munckhof, et al., 2019). Despite the  
342 potential value of vaginal microbiota analysis in protecting women's health, the  
343 challenges of all currently used sequencing equipment, including their price and running  
344 costs, and the 2–3 weeks required to obtain results in outsourced testing (in Japan), have  
345 prevented widespread use of vaginal microbiota analysis.

346 Having used MinION™ in our vaginal microbiota analysis workflow, we have seen  
347 four key benefits. 1) Convenience: The unit is extremely light, small, and portable, and  
348 sequencing can occur via a USB connection to an in-clinic PC. 2) Speed: The average  
349 time between specimen collection and result disclosure is 2 days. 3) Economy: Analysis  
350 of a small number of samples can be performed without increasing the unit cost of the  
351 test, by using individual barcodes. 4) Functionality: Although MinION™ has been  
352 reported to have a slightly higher error rate, the technical issues are being resolved and  
353 even the intestinal microbiota can now be identified (Matsuo, et al., 2020). In particular,  
354 the analysis of vaginal microbiota characterized by low diversity, as in the present  
355 study, allowed for comparable species-level identification (Kilianski, et al., 2015).

356 Although this study focused on the vaginal microbiota, a similar workflow could be  
357 applied to many clinical areas in the future, and the benefits of MinION™ could make it  
358 easier for clinicians to successfully perform bacterial metagenome analysis. In addition,  
359 future large-scale microbiota studies could lead to new clinical findings.

360 In conclusion, our validation shows that the MinION™ long-read sequencer provides a  
361 low-cost, rapid workflow for identifying vaginal microbiota with higher resolution in a  
362 clinical setting. Detecting vaginal microbiota at the species level has the potential to  
363 identify risks to women's health, as well as facilitating large-scale clinical studies in any  
364 medical field.

365 **Authors' roles**

366 S.K., Y.Ma., Y.Mo., H.O. and K.H. designed and supervised the study. S.K., Y.Mo. and  
367 H.O. contributed to sample collection. S.N., K.K. and T.I. built the bioinformatics  
368 pipeline. S.K., Y.Ma. and K.H. contributed to the experiments. S.K. analyzed the data.  
369 S.K. wrote the manuscript. Y.Ma., S.N., K.K., H.O. and K.H. contributed to editing the  
370 manuscript. All authors read and approved the final manuscript.

371

372 **Acknowledgments**

373 We would like to thank Edanz (<https://en-author-services.edanzgroup.com/ac>) for  
374 editing the English text of a draft of this manuscript.

375

376 **Funding**

377 This work was supported by Japan Society for the Promotion of Science KAKENHI  
378 Grant Numbers JP19K09339 (to Y.Ma.), JP17H07123 (to K.K.), JP20K06612 (to K.K.),  
379 and the Branding Program as a World-leading Research University on Intractable  
380 Immune and Allergic Diseases supported by the Ministry of Education, Culture, Sports,  
381 Science and Technology of Japan.

382

383 **Conflict of interest**

384 No authors have any conflicts of interest to declare.

385

386 **Abbreviations**

387 BV: Bacterial vaginosis, CST: community state type, NGS: Next-generation  
388 sequencing, PCoA: principal coordinate analysis, PCR: polymerase chain reaction,  
389 rRNA: ribosomal RNA

390

391 **Data availability**



392 Sequence data from this article have been deposited in the DDBJ DRA database  
393 ([www.ddbj.nig.ac.jp/dra/index-e.html](http://www.ddbj.nig.ac.jp/dra/index-e.html)) under accession numbers DRR244979–  
394 DRR245006.

395

396 **Additional files**

397 **Supplementary Table S1.** Representative bacterial genomes stored in the GenomeSync  
398 database.

399 **Supplementary Table S2.** Details of identified species by V1–9 16S rRNA analysis  
400 using MinION™ by Minimap2 best-hit score (>1%).

401

402 **References**

- 403 Amsel R, Totten PA, Spiegel CA, Chen KC, Eschenbach D, Holmes KK. Nonspecific  
404 vaginitis. Diagnostic criteria and microbial and epidemiologic associations. *Am J Med*  
405 1983; **74**: 14-22.
- 406 Borgogna JC, Shardell MD, Santori EK, Nelson TM, Rath JM, Glover ED, Ravel J,  
407 Gravitt PE, Yeoman CJ, Brotman RM. The vaginal metabolome and microbiota of  
408 cervical HPV-positive and HPV-negative women: a cross-sectional analysis. *BJOG*  
409 2020; **127**: 182-192.
- 410 Dahoud W, Michael CW, Gokozan H, Nakanishi AK, Harbhajanka A. Association of  
411 Bacterial Vaginosis and Human Papilloma Virus Infection With Cervical Squamous  
412 Intraepithelial Lesions. *Am J Clin Pathol* 2019; **152**: 185-189.
- 413 Frith MC. A new repeat-masking method enables specific detection of homologous  
414 sequences. *Nucleic Acids Res* 2011; **39**: e23.
- 415 Hoang T, Toler E, DeLong K, Mafunda NA, Bloom SM, Zierden HC, Moench TR,  
416 Coleman JS, Hanes J, Kwon DS *et al*. The cervicovaginal mucus barrier to HIV-1 is  
417 diminished in bacterial vaginosis. *PLoS Pathog* 2020; **16**: e1008236.
- 418 Human Microbiome Project C. Structure, function and diversity of the healthy human  
419 microbiome. *Nature* 2012; **486**: 207-214.
- 420 Kai S, Matsuo Y, Nakagawa S, Kryukov K, Matsukawa S, Tanaka H, Iwai T, Imanishi T,  
421 Hirota K. Rapid bacterial identification by direct PCR amplification of 16S rRNA  
422 genes using the MinION™ nanopore sequencer. *FEBS Open Bio* 2019; **9**: 548-557.
- 423 Kilianski A, Haas JL, Corriveau EJ, Liem AT, Willis KL, Kadavy DR, Rosenzweig CN,  
424 Minot SS. Bacterial and viral identification and differentiation by amplicon sequencing  
425 on the MinION nanopore sequencer. *Gigascience* 2015; **4**: 12.
- 426 Larsson PG, Bergstrom M, Forsum U, Jacobsson B, Strand A, Wolner-Hanssen P.  
427 Bacterial vaginosis. Transmission, role in genital tract infection and pregnancy  
428 outcome: an enigma. *APMIS* 2005; **113**: 233-245.

- 429 Li H. Minimap2: pairwise alignment for nucleotide sequences. *Bioinformatics* 2018; **34**:  
430 3094-3100.
- 431 Matsuo Y, Komiya S, Yasumizu Y, Yasuoka Y, Mizushima K, Takagi T, Krykov K,  
432 Fukuda A, Morimoto Y, Naito Y, Okada H, Bono H, Nakagawa S, Hirota K. Full-length  
433 16S rRNA gene amplicon analysis of human gut microbiota using MinION nanopore  
434 sequencing confers species-level resolution. *bioRxiv* 2020  
435 <https://doi.org/10.1101/2020.05.06.078147>
- 436 Mikheyev AS, Tin MM. A first look at the Oxford Nanopore MinION sequencer. *Mol*  
437 *Ecol Resour* 2014; **14**: 1097-1102.
- 438 Mitsuhashi S, Kryukov K, Nakagawa S, Takeuchi JS, Shiraishi Y, Asano K, Imanishi T.  
439 A portable system for rapid bacterial composition analysis using a nanopore-based  
440 sequencer and laptop computer. *Sci Rep* 2017; **7**: 5657.
- 441 Nakagawa S, Inoue S, Kryukov K, Yamagishi J, Ohno A, Hayashida K, Nakazwe R,  
442 Kalumbi M, Mwenya D, Asami N *et al*. Rapid sequencing-based diagnosis of infectious  
443 bacterial species from meningitis patients in Zambia. *Clin Transl Immunology* 2019; **8**:  
444 e01087.
- 445 Nardis C, Mosca L, Mastromarino P. Vaginal microbiota and viral sexually transmitted  
446 diseases. *Ann Ig* 2013; **25**: 443-456.
- 447 Nugent RP, Krohn MA, Hillier SL. Reliability of diagnosing bacterial vaginosis is  
448 improved by a standardized method of gram stain interpretation. *J Clin Microbiol* 1991;  
449 **29**: 297-301.
- 450 Ondov BD, Bergman NH, Phillippy AM. Interactive metagenomic visualization in a  
451 Web browser. *BMC Bioinformatics* 2011; **12**: 385.
- 452 Ravel J, Gajer P, Abdo Z, Schneider GM, Koenig SS, McCulle SL, Karlebach S, Gorle  
453 R, Russell J, Tacket CO *et al*. Vaginal microbiome of reproductive-age women. *Proc*  
454 *Natl Acad Sci U S A* 2011; **108 Suppl 1**: 4680-4687.
- 455 Shen W, Le S, Li Y, Hu F. SeqKit: A Cross-Platform and Ultrafast Toolkit for FASTA/Q

456 File Manipulation. *PLoS One* 2016; **11**: e0163962.

457 Shipitsyna E, Khusnutdinova T, Budilovskaya O, Krysanova A, Shalepo K, Savicheva  
458 A, Unemo M. Bacterial vaginosis-associated vaginal microbiota is an age-independent  
459 risk factor for Chlamydia trachomatis, Mycoplasma genitalium and Trichomonas  
460 vaginalis infections in low-risk women, St. Petersburg, Russia. *Eur J Clin Microbiol*  
461 *Infect Dis* 2020; **39**: 1221-1230.

462 Thomason JL, Gelbart SM, Scaglione NJ. Bacterial vaginosis: current review with  
463 indications for asymptomatic therapy. *Am J Obstet Gynecol* 1991; **165**: 1210-1217.

464 van den Munckhof EHA, van Sitter RL, Boers KE, Lamont RF, Te Witt R, le Cessie S,  
465 Knetsch CW, van Doorn LJ, Quint WGV, Molijn A *et al.* Comparison of Amsel criteria,  
466 Nugent score, culture and two CE-IVD marked quantitative real-time PCRs with  
467 microbiota analysis for the diagnosis of bacterial vaginosis. *Eur J Clin Microbiol Infect*  
468 *Dis* 2019; **38**: 959-966.

469 Virtanen S, Kalliala I, Nieminen P, Salonen A. Comparative analysis of vaginal  
470 microbiota sampling using 16S rRNA gene analysis. *PLoS One* 2017; **12**: e0181477.  
471

472 **Tables**

473 **Table I** Participants' background

| Sample | Age<br>(y.o.) | AMH<br>(ng/mL) | LH<br>(mIU/mL) | FSH<br>(mIU/mL) | BMI<br>(kg/m <sup>2</sup> ) |
|--------|---------------|----------------|----------------|-----------------|-----------------------------|
| 1      | 36            | 0.47           | 7.2            | 6.8             | 18.8                        |
| 2      | 36            | 1.15           | 3.7            | 5.0             | 25.6                        |
| 3      | 42            | 0.23           | 8.3            | 11.3            | 21.0                        |
| 4      | 30            | 9.16           | 6.8            | 7.2             | 26.0                        |
| 5      | 43            | 1.67           | 2.8            | 5.5             | 20.8                        |
| 6      | 33            | 3.11           | 3.2            | 5.5             | 25.0                        |
| 7      | 35            | 5.89           | 5.1            | 7.9             | 20.9                        |
| 8      | 35            | 4.98           | 2.6            | 4.9             | 18.8                        |
| 9      | 43            | 2.26           | 1.8            | 6.0             | 19.4                        |
| 10     | 39            | 0.59           | 6.5            | 6.3             | 22.4                        |
| 11     | 37            | 2.34           | 8.9            | 6.0             | 18.6                        |
| 12     | 34            | 4.52           | 5.2            | 5.8             | 20.3                        |
| 13     | 35            | 2.62           | 8.8            | 8.2             | 23.0                        |
| 14     | 37            | 3.16           | 2.0            | 3.8             | 22.1                        |
| 15     | 40            | 3.69           | 8.2            | 7.6             | 20.4                        |
| 16     | 38            | 2.27           | 6.4            | 8.4             | 18.1                        |
| 17     | 35            | 3.66           | 6.9            | 7.8             | 20.4                        |
| 18     | 38            | 0.44           | 3.5            | 6.0             | 19.1                        |

AMH: anti-Mullerian hormone, LH: luteinizing hormone, FSH: follicle-stimulating hormone, BMI: body mass index

475 **Table II** Statistics of MinION™ V1–9 sequencing data

| Sample         | Pass reads   |          |          | Filtered reads |                 |          |
|----------------|--------------|----------|----------|----------------|-----------------|----------|
|                | No. of reads | Min (bp) | Avg (bp) | Max (bp)       | No. of reads    | Avg (bp) |
| 1_lavage_V1-9  | 115,957      | 128      | 1,434.3  | 4,377          | 91,449 (78.9%)  | 1,633.5  |
| 1_swab_V1-9    | 63,547       | 155      | 1,078.0  | 4,193          | 31,462 (49.5%)  | 1,619.3  |
| 2_lavage_V1-9  | 33,721       | 158      | 1,507.2  | 4,486          | 28,718 (85.2%)  | 1,607.0  |
| 2_swab_V1-9    | 53,584       | 145      | 1,203.6  | 3,746          | 33,294 (62.1%)  | 1,613.6  |
| 3_lavage_V1-9  | 28,071       | 154      | 1,396.3  | 4,875          | 20,958 (74.7%)  | 1,613.8  |
| 3_swab_V1-9    | 23,053       | 162      | 1,521.0  | 3,990          | 20,073 (87.1%)  | 1,614.5  |
| 4_lavage_V1-9  | 30,603       | 155      | 1,502.9  | 4,977          | 25,756 (84.2%)  | 1,639.5  |
| 4_swab_V1-9    | 37,597       | 161      | 1,103.2  | 3,383          | 19,588 (52.1%)  | 1,644.9  |
| 5_lavage_V1-9  | 15,836       | 147      | 1,346.1  | 3,393          | 10,688 (67.5%)  | 1,632.8  |
| 6_lavage_V1-9  | 38,020       | 144      | 1,517.2  | 3,787          | 32,255 (84.8%)  | 1,642.4  |
| 7_lavage_V1-9  | 61,432       | 158      | 1,218.8  | 5,035          | 37,018 (60.3%)  | 1,631.4  |
| 8_lavage_V1-9  | 52,071       | 111      | 1,257.5  | 3,344          | 33,906 (65.1%)  | 1,603.2  |
| 9_lavage_V1-9  | 119,745      | 125      | 1,530.5  | 4,664          | 103,212 (86.2%) | 1,649.4  |
| 10_lavage_V1-9 | 102,333      | 150      | 1,496.5  | 4,980          | 84,028 (82.1%)  | 1,650.2  |
| 11_lavage_V1-9 | 61,756       | 121      | 1,541.3  | 3,519          | 54,116 (87.6%)  | 1,647.8  |
| 12_lavage_V1-9 | 101,755      | 120      | 1,433.9  | 4,759          | 77,756 (76.4%)  | 1,635.8  |
| 13_lavage_V1-9 | 71,041       | 134      | 1,437.5  | 4,828          | 56,601 (79.7%)  | 1,599.2  |
| 14_lavage_V1-9 | 42,629       | 159      | 1,367.7  | 4,981          | 31,447 (73.8%)  | 1,629.0  |
| 15_lavage_V1-9 | 52,908       | 172      | 1,452.9  | 3,333          | 42,910 (81.1%)  | 1,630.4  |
| 16_lavage_V1-9 | 52,230       | 153      | 1,480.3  | 4,345          | 43,549 (83.4%)  | 1,633.0  |
| 17_lavage_V1-9 | 38,219       | 154      | 1,478.3  | 3,453          | 31,757 (83.1%)  | 1,625.3  |
| 18_lavage_V1-9 | 28,886       | 185      | 1,464.7  | 3,328          | 23,816 (82.4%)  | 1,631.8  |

476 Min: minimum read length, Avg: average read length, Max: maximum read length

477

478 **Figure legends**

479 **Fig. 1** Workflow of 16S rRNA amplicon sequencing with the MinION™ platform and  
480 bioinformatic analysis. After collecting the vaginal sample, it should be stored in a freezer  
481 at –30°C until DNA extraction begins. Some swab collection kits should be stored at  
482 room temperature, in accordance with the manufacturer’s instructions. Sequencing  
483 libraries are generated by a four-primer PCR-based strategy; in the initial stages of PCR,  
484 the 16S rRNA gene is amplified with an inner primer pair. The PCR product is amplified  
485 with the outer primers and targeted to introduce identical barcode and tag sequences at  
486 both ends, allowing for the attachment of adapter molecules in a one-step reaction. The  
487 library is then loaded into a MinION™ connected to a personal computer. With our  
488 experimental method, sequencing runtime of 10 min is sufficient for 3,000 reads to be  
489 obtained. A final report of the microbiota can be presented within 2 days of initiating the  
490 analysis.

491

492 **Fig. 2** Taxonomic profiles comparing the different sampling method (lavage and swab)  
493 results of V1–9 16S rRNA MinION™ sequencing with 3,000 randomly sampled reads  
494 after filtration. In the analytical algorithm, we assigned the bacterial name that showed  
495 the highest Minimap2 score for each read; bacteria with an assignment of less than 1%  
496 were included in “Others.”

497

498 **Fig. 3** PCoA of vaginal microbiota by different sampling techniques. The coordinates of  
499 swab samples and lavage samples were nearly equivalent and did not show any effect of  
500 the vaginal specimen collection method in the 3,000 filtered reads of V1–9 MinION™  
501 sequencing.

502

503 **Fig. 4** Taxonomic profiles comparing the results obtained for 3,000 and 10,000 filtered  
504 reads of V1–9 MinION™ sequencing. In the analytical algorithm, we assigned the

505 bacterial name that showed the highest Minimap2 score for each read; bacteria with an  
506 assignment of less than 1% were included in “Others.”

507

508 **Fig. 5** Taxonomic profiles comparing the results of V3–4 and V1–9 16S rRNA sequences  
509 using MinION™ in 3,000 filtered reads. **(a)** In three cases, *Lactobacillus iners* was shown  
510 to constitute more than 99% of the bacteria by MinION™ analysis with the V1–9 region  
511 (Group I). **(b)** In three cases, *Lactobacillus crispatus* was shown to constitute more than  
512 99% of the bacteria by MinION™ analysis with the V1–9 region (Group C).

513

514



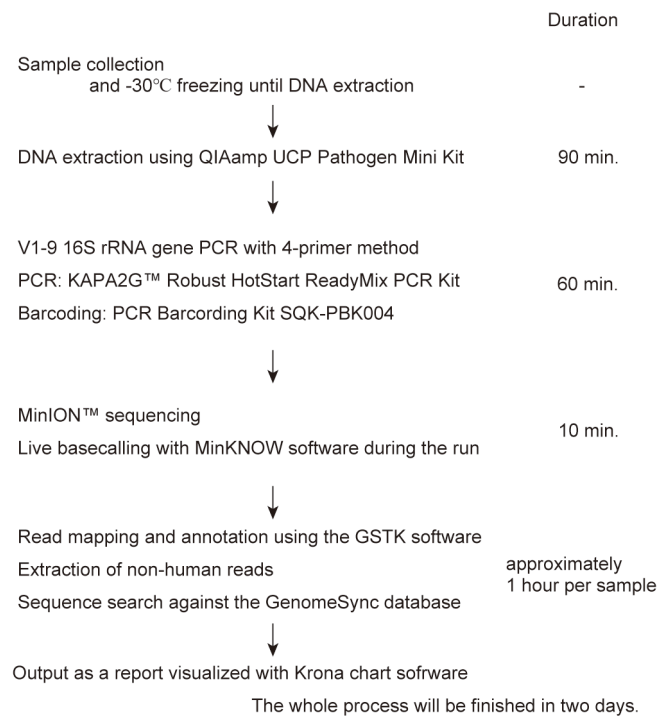

Figure 1

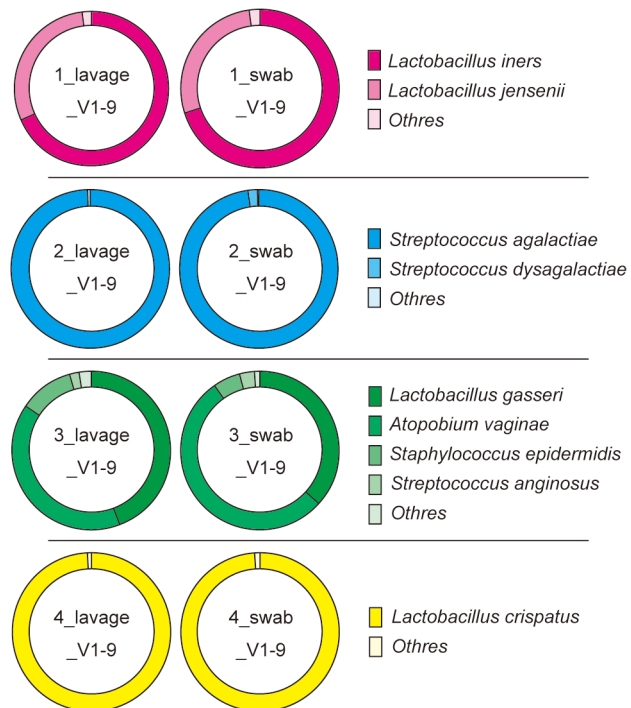

Figure 2

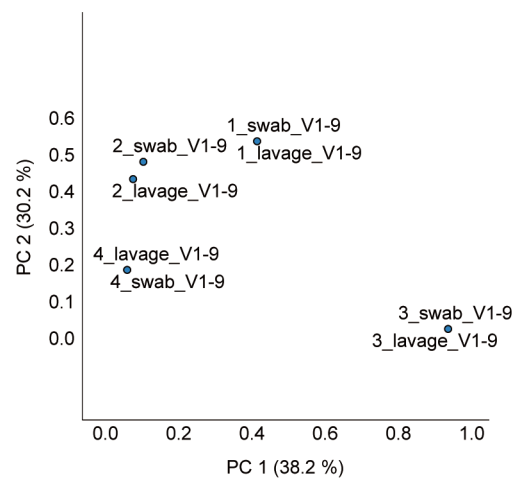

Figure 3

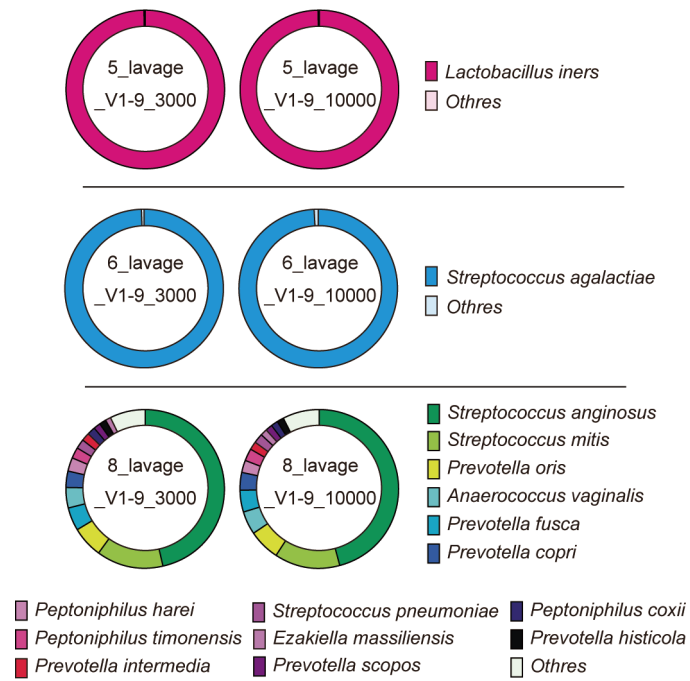

Figure 4

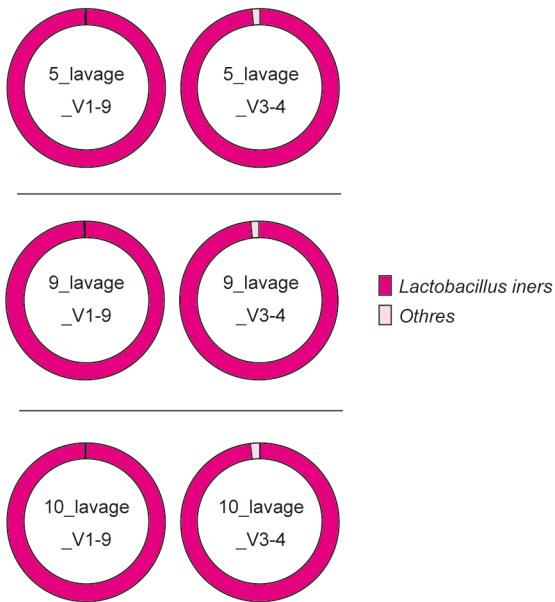

Fig. 5a

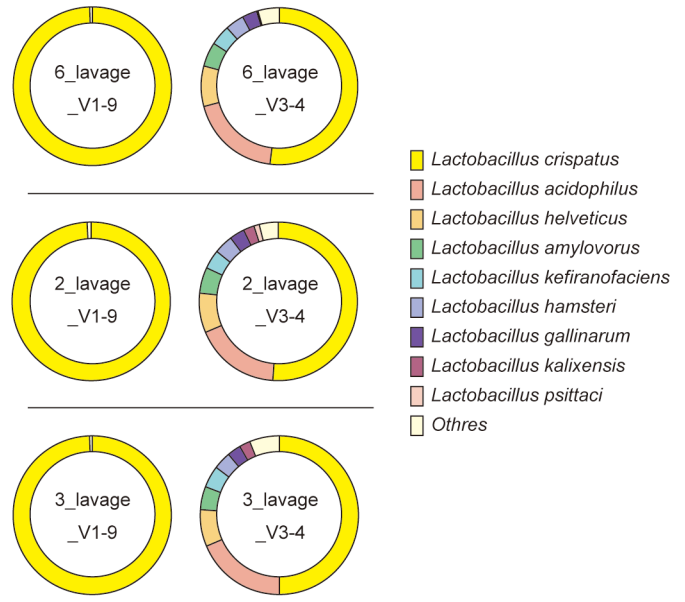

Fig. 5b
